# Supplementary material for: Occurrence of artificial sweeteners in human liver and paired blood and urine samples from adults in Tianjin, China and their implications for human exposure
Source: Royal Society of Chemistry journal article supplement (doi:10.1039/c6em00130k), 2016-01-01
Supplement: c6em00130k1.pdf [file c6em00130k1.pdf]

## Supplementary Material

**Occurrence of artificial sweeteners in human liver and paired blood and urine from adults in**

**Tianjin, China and their implications for human exposure**

Tao Zhang,<sup>a, b\*</sup> Zhiwei Gan,<sup>c</sup> Chuanzi Gao,<sup>a</sup> Ling Ma,<sup>b</sup> Yanxi Li,<sup>a</sup> Xiao Li,<sup>a</sup> Hongwen Sun,<sup>b\*</sup>

<sup>a</sup> *School of Environmental Science and Engineering; Guangdong Provincial Key Laboratory of Environmental Pollution Control and Remediation Technology, Sun Yat-Sen University, Guangzhou 510275, PR China*

<sup>b</sup> *College of Environmental Sciences and Engineering, Ministry of Education Key Laboratory of Pollution Processes and Environmental Criteria, Nankai University, Tianjin 300071, China*

<sup>c</sup> *College of Architecture and Environment, Sichuan University, Chengdu 610065, China*

**\*Corresponding author:**

**Tao Zhang**

**School of Environmental Science and Engineering, Sun Yat-Sen University**

**135 Xingang West Street, Guangzhou, 510275, China**

**Tel: 86-22-84113454**

**Email: [zhangt47@mail.sysu.edu.cn](mailto:zhangt47@mail.sysu.edu.cn)**

**Hongwen Sun**

**College of Environmental Science and Engineering, Nankai University**

**94 Weijin Street, Tianjin, 300071, China**

**Tel: 86-22-23509241**

**Fax: 86-22-23509241**

**Email: [sunhongwen@nankai.edu.cn](mailto:sunhongwen@nankai.edu.cn)**

**Submission to: Environmental Science: Processes & Impacts**

### *Standards and reagents*

Native standards: saccharin (SAC,  $\geq 99\%$ ), cyclamate (CYC,  $\geq 99\%$ ), and acesulfame (ACE,  $\geq 99\%$ ) were purchased from Sigma-Aldrich (St. Louis, MO, USA); neotame (NEO,  $\geq 98\%$ ) was acquired from USP Reference Standards (Rockville, MD, USA); and aspartame (ASP, analytical standard) was obtained from Supelco (Bellefonte, PA, USA). Internal standards: ACE-d<sub>4</sub> and ASP-d<sub>5</sub> were obtained from TRC (North York, ON, Canada). The structures and selected properties of investigated ASs in present study are shown in **Table S1**.

All other solvents and reagents were of HPLC or analytical grade. Methyl tert-butyl ether (MTBE) and methanol were purchased from Dima Technology Inc (Richmond Hill, ON, USA). Sodium carbonate, sodium bicarbonate, ammonium acetate, ammonium hydroxide, tris (hydroxymethyl) aminomethane (TRIS) and tetrabutyl ammonium hydrogen sulfate (TBAHS) used as ion-pair reagent were obtained from Aldrich (St Louis, MO, USA).

Oasis WAX extraction cartridges (3cc, 60 mg) were purchased from Waters Company (Milford, MA, USA). The Envi-carbon particle was obtained from Supelco (Bellefonte, PA, USA).

### *Sample extraction*

Urine: approximately 20 mL of urine sample was transferred into a 50-mL PP-tube, and then spiked with 300 ng (30  $\mu$ L, 10 ng/ $\mu$ L) of each internal standard (ACE-d<sub>4</sub> and ASP-d<sub>5</sub>). The spiked samples were extracted using Oasis WAX extraction cartridges (60 mg/3 cc). Prior to loading of the samples, the WAX cartridges were conditioned with 4 mL of 0.1% ammonium hydroxide in methanol, and 4 mL of milli-Q water. The samples were loaded on the conditioned cartridge at a rate of 3 mL/min. The cartridges were then washed with 4 mL of 25 mM sodium acetate buffer (pH = 4). Then, elutes was performed by shaking the slurry for 10 mins, and centrifugation at 3800 ( $\times$ g) for 8

mins. Finally, the extracted solutions were transferred into an autosampler vial for instrumental analysis.

Whole blood and liver: Prior to extraction, samples of whole blood were thawed and allowed to return to room temperature. One milliliter of blood sample (approximately 0.2 g of homogenized liver) was added to a 15 mL polypropylene (PP) tube, 10 ng of internal standards (ACE-d<sub>4</sub> and ASP-d<sub>5</sub>, 100 µL, 0.10 ng/µL), 2.0 mL of 0.25 M sodium carbonate buffer and 1.0 mL of 0.5 M TBAHS (adjusted to pH 10) were added. After sufficient mixing, the extraction was carried out by the addition of 5 mL of MTBE, and the mixture was shaken vigorously for 40 mins. The organic layer were separated from the aqueous layer by centrifugation at 3800 (×g) for 5 mins and then transferred into a new 15 mL PP-tube. The extraction procedure was repeated with 3 mL of MTBE, the mixture was shaken vigorously for 20 mins and combined with the first fraction. The solvent was evaporated to near-dryness under a gentle stream of high-purity nitrogen and then reconstituted with 1.0 mL of methanol. After centrifugation at 3800 (×g) for 2 min, the solution were transferred into an autosampler vial for HPLC-MS/MS analysis.

#### *Instrumental analysis*

Separations were performed on an Agilent 1200 system (Agilent Technologies, USA) equipped with a CNW Athena C18-WP column (4.6 mm×150 mm, 3 µm) (CNW Technologies GmbH, Germany). The column was kept at 30°C. The mobile phase was composed of water (A) and acetonitrile (B), both containing 5 mM of ammonium acetate and 1 mM TRIS. Gradient elution was performed at a flow rate of 0.4 mL/min. The mobile phase gradient was ramped linearly from 0% to 75% B over 8 min, held for 1 min, returned back to 10% B over 1 min, ramped again to 70% B within 0.5 min, and held for 1.9 min. Eluent B was then lowered back to 0% within 0.5 min, and the

system was allowed to equilibrate for 8 min before the next injection. The injection volume was 20  $\mu\text{L}$ , and injection was performed by an autosampler. Mass spectrometric analysis was performed using an Agilent 6410B Triple Quadrupole mass spectrometer (Agilent Technologies, USA) operated in negative ionization multiple-reaction monitoring (MRM) mode. Nitrogen (with a purity of 99.9%) was the desolvation gas with a manipulating temperature of 350°C. The flow rate was 10 L/min, and the nebulizing gas pressure was 50 psi. The capillary voltage was 4000 V. The dwell time was 200 ms. The mass transitions monitored were: 162 > 82.0 for ACE, 178.1 > 80.0 for CYC, 182.0 > 42.1 for SAC, 293.2 > 200.2 for ASP, 377.3 > 200.2 for NEO, 166.1 > 86.1 for ACE-d4, 298.3 > 205.2 for ASP-d5. When possible, multiple daughter ions were monitored for confirmation, but quantitation was based on a single product ion.

**Table S1**

Structures and selected properties of the five artificial sweeteners analyzed in this study.

|                          | Saccharin (SAC)                                                                   | Cyclamate (CYC)                                                                   | Acesulfame-K (ACE)                                                                | Aspartame (ASP)                                                                     | Neotame (NEO)                                                                       |
|--------------------------|-----------------------------------------------------------------------------------|-----------------------------------------------------------------------------------|-----------------------------------------------------------------------------------|-------------------------------------------------------------------------------------|-------------------------------------------------------------------------------------|
| CAS no.                  | 81-07-2                                                                           | 139-05-9                                                                          | 33665-90-6                                                                        | 22839-47-0                                                                          | 165450-17-9                                                                         |
| Structure                | 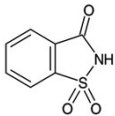 |  |  |  |  |
| Molecular formula        | C <sub>7</sub> H <sub>5</sub> NO <sub>3</sub> S                                   | C <sub>6</sub> H <sub>12</sub> NaNO <sub>3</sub> S                                | C <sub>4</sub> H <sub>4</sub> KNO <sub>4</sub> S                                  | C <sub>14</sub> H <sub>18</sub> N <sub>2</sub> O <sub>5</sub>                       | C <sub>20</sub> H <sub>30</sub> N <sub>2</sub> O <sub>5</sub>                       |
| Molecular weight (g/mol) | 183.19                                                                            | 201.24                                                                            | 201.15                                                                            | 294.31                                                                              | 378.47                                                                              |
| Log Kow                  | 0.91                                                                              | - 1.61                                                                            | - 1.33                                                                            | 0.07                                                                                | 2.39                                                                                |
| ADI (mg/kg bw/day)       | 5.0                                                                               | 7.0                                                                               | 9.0                                                                               | 40                                                                                  | 2.0                                                                                 |

**Table S2**  
**Characteristics of investigated participants.**

| variables                             | N <sup>a</sup> | range                                       | mean | SD   | median |
|---------------------------------------|----------------|---------------------------------------------|------|------|--------|
| <i>General adults (n = 54)</i>        |                |                                             |      |      |        |
| age (yrs)                             | 54             | 22-62                                       | 43.2 | 10.2 | 47     |
| BMI <sup>b</sup> (kg/m <sup>2</sup> ) | 36             | 18.4-31.3                                   | 23.3 | 2.36 | 22.7   |
| sex distribution                      | 54             | male: 29; female: 25                        |      |      |        |
| age distribution                      | 54             | 21-40 yrs: 17; 41-50 yrs: 17; 51-62 yrs: 20 |      |      |        |
| <i>Liver cancer patients (n = 11)</i> |                |                                             |      |      |        |
| age (yrs)                             | 11             | 39-80                                       | 59.5 | 13.1 | 58     |
| Sex distribution                      | 11             | male: 7; female: 4                          |      |      |        |

<sup>a</sup> total number may not be equal to the number of cases due to missing or unknown data.

<sup>b</sup> BMI = Body Mass Index, BMI were calculated based on pre-delivery weight for pregnant women.

**Table S3**

Investigation on the usage of artificial sweeteners in six AS-containing food groups (i.e., pickles, preserved fruit, beverages, candies, condiments and puffed food) and one AS-containing living supply (i.e., commodities) selected from market in China <sup>a</sup>.

| product groups               | brand No. | Product No. | ACE            | ASP            | SAC | CYC | NEO | details            |
|------------------------------|-----------|-------------|----------------|----------------|-----|-----|-----|--------------------|
| pickles (vegetable products) | B1        | P1          | ✓ <sup>b</sup> | × <sup>c</sup> | ×   | ✓   | ×   | preserved mustard  |
|                              |           | P2          | ✓              | ×              | ×   | ✓   | ×   | enoki mushroom     |
|                              |           | P3          | ✓              | ×              | ×   | ✓   | ×   | bamboo shoot       |
|                              | B2        | P4          | ✓              | ×              | ✓   | ✓   | ×   | preserved mustard  |
|                              |           | P5          | ✓              | ×              | ✓   | ✓   | ×   | enoki mushroom     |
|                              |           | P6          | ✓              | ×              | ✓   | ✓   | ×   | bamboo shoot       |
|                              | B3        | P7          | ✓              | ×              | ✓   | ✓   | ×   | preserved mustard  |
|                              |           | P8          | ✓              | ×              | ✓   | ✓   | ×   | enoki mushroom     |
|                              |           | P9          | ✓              | ×              | ✓   | ✓   | ×   | bamboo shoot       |
|                              | B4        | P10         | ✓              | ×              | ×   | ×   | ×   | preserved mustard  |
|                              |           | P11         | ✓              | ×              | ×   | ×   | ×   | enoki mushroom     |
|                              |           | P12         | ✓              | ×              | ×   | ×   | ×   | bamboo shoot       |
|                              |           | P13         | ✓              | ×              | ×   | ×   | ×   | radish             |
|                              |           | P14         | ✓              | ×              | ×   | ×   | ×   | pea                |
|                              | B5        | P15         | ✓              | ×              | ×   | ×   | ×   | preserved mustard  |
|                              |           | P16         | ✓              | ×              | ×   | ×   | ×   | bamboo shoot       |
|                              |           | P17         | ✓              | ×              | ×   | ×   | ×   | radish             |
|                              |           | P18         | ✓              | ×              | ×   | ×   | ×   | pea                |
|                              | B6        | P19         | ✓              | ×              | ×   | ×   | ×   | cabbage (mild)     |
|                              |           | P20         | ✓              | ×              | ×   | ×   | ×   | cabbage (moderate) |
|                              |           | P21         | ✓              | ×              | ×   | ×   | ×   | cabbage (hot)      |
|                              | B7        | P22         | ✓              | ×              | ×   | ×   | ×   | enoki mushroom     |
|                              |           | P23         | ✓              | ×              | ×   | ×   | ×   | pea                |
|                              |           | P24         | ✓              | ×              | ×   | ×   | ×   | leek               |
|                              | B8        | P25         | ✓              | ×              | ×   | ×   | ×   | radish             |
|                              |           | P26         | ✓              | ×              | ×   | ×   | ×   | preserved mustard  |
|                              |           | P27         | ✓              | ×              | ×   | ×   | ×   | bamboo shoot       |
|                              | B9        | P28         | ✓              | ×              | ×   | ×   | ×   | carrot             |
|                              |           | P29         | ✓              | ×              | ×   | ×   | ×   | radish             |
|                              |           | P30         | ✓              | ×              | ×   | ×   | ×   | bamboo shoot       |
|                              | B10       | P31         | ✓              | ×              | ×   | ×   | ×   | kale borecole      |
|                              |           | P32         | ✓              | ×              | ×   | ×   | ×   | pea                |
|                              |           | P33         | ✓              | ×              | ×   | ×   | ×   | leek               |
|                              | B11       | P34         | ✓              | ×              | ×   | ×   | ×   | kale borecole      |
|                              |           | P35         | ✓              | ×              | ×   | ×   | ×   | pea                |
|                              |           | P36         | ✓              | ×              | ×   | ×   | ×   | leek               |
|                              | B12       | P37         | ✓              | ×              | ×   | ×   | ×   | kale borecole      |
|                              |           | P38         | ✓              | ×              | ×   | ×   | ×   | pea                |
|                              | B13       | P39         | ✓              | ×              | ×   | ×   | ×   | preserved mustard  |
|                              |           | P40         | ✓              | ×              | ×   | ×   | ×   | radish             |
|                              |           | P41         | ✓              | ×              | ×   | ×   | ×   | pea                |
|                              | B14       | P42         | ✓              | ×              | ×   | ×   | ×   | preserved mustard  |
|                              |           | P43         | ✓              | ×              | ×   | ×   | ×   | radish             |
|                              | B15       | P44         | ✓              | ×              | ×   | ×   | ×   | pea                |
|                              |           | P45         | ✓              | ×              | ×   | ×   | ×   | preserved mustard  |

Table S2. Continue

| product groups  | brand No. | Product No. | ACE | ASP | SAC | CYC | NEO | details         |
|-----------------|-----------|-------------|-----|-----|-----|-----|-----|-----------------|
| preserved fruit | B16       | P46         | ×   | ×   | ✓   | ✓   | ×   | red bayberry    |
|                 |           | P47         | ×   | ×   | ✓   | ✓   | ×   | kiwi berry      |
|                 |           | P48         | ×   | ×   | ✓   | ✓   | ×   | orange          |
|                 | B17       | P49         | ×   | ✓   | ✓   | ✓   | ×   | mango           |
|                 |           | P50         | ×   | ✓   | ✓   | ✓   | ×   | apple           |
|                 |           | P51         | ×   | ✓   | ✓   | ✓   | ×   | grape           |
|                 | B18       | P52         | ×   | ✓   | ✓   | ✓   | ×   | orange          |
|                 |           | P53         | ×   | ✓   | ✓   | ✓   | ×   | mango           |
|                 |           | P54         | ×   | ✓   | ✓   | ✓   | ×   | apple           |
|                 | B19       | P55         | ×   | ×   | ✓   | ✓   | ×   | hami melon      |
|                 |           | P56         | ×   | ×   | ✓   | ✓   | ×   | blueberry       |
|                 |           | P57         | ×   | ×   | ✓   | ✓   | ×   | durian          |
|                 | B20       | P58         | ×   | ✓   | ✓   | ✓   | ×   | cumquat         |
|                 |           | P59         | ×   | ✓   | ✓   | ✓   | ×   | solanum tuberds |
|                 |           | P60         | ×   | ✓   | ✓   | ✓   | ×   | mulberry        |
|                 | B21       | P61         | ×   | ×   | ✓   | ✓   | ×   | red bayberry    |
|                 |           | P62         | ×   | ×   | ✓   | ✓   | ×   | plum candy      |
|                 |           | P63         | ×   | ×   | ✓   | ✓   | ×   | prune           |
|                 |           | P64         | ×   | ×   | ✓   | ✓   | ×   | green plum      |
|                 |           | P65         | ×   | ×   | ✓   | ✓   | ×   | dark plum       |
|                 | B22       | P66         | ×   | ×   | ✓   | ✓   | ×   | red bayberry    |
|                 |           | P67         | ×   | ×   | ✓   | ✓   | ×   | plum candy      |
|                 |           | P68         | ×   | ×   | ✓   | ✓   | ×   | prune           |
|                 |           | P69         | ×   | ×   | ✓   | ✓   | ×   | green plum      |
|                 |           | P70         | ×   | ×   | ✓   | ✓   | ×   | dark plum       |
|                 | B23       | P71         | ×   | ✓   | ✓   | ✓   | ×   | mango           |
|                 |           | P72         | ×   | ✓   | ✓   | ✓   | ×   | papaya          |
|                 | B24       | P73         | ×   | ✓   | ✓   | ✓   | ×   | papaya          |
|                 |           | P74         | ×   | ✓   | ✓   | ✓   | ×   | prune           |
|                 |           | P75         | ×   | ✓   | ✓   | ✓   | ×   | green plum      |
|                 |           | P76         | ×   | ✓   | ✓   | ✓   | ×   | dark plum       |
|                 | B25       | P77         | ×   | ×   | ✓   | ✓   | ×   | red bayberry    |
|                 |           | P78         | ×   | ×   | ✓   | ✓   | ×   | mango           |
|                 |           | P79         | ×   | ×   | ✓   | ✓   | ×   | papaya          |
|                 | B26       | P80         | ×   | ✓   | ×   | ×   | ×   | banana          |
|                 |           | P81         | ×   | ✓   | ×   | ×   | ×   | grape           |
|                 | B27       | P82         | ×   | ✓   | ✓   | ✓   | ×   | banana          |
|                 |           | P83         | ×   | ✓   | ✓   | ✓   | ×   | red bayberry    |
|                 |           | P84         | ×   | ✓   | ✓   | ✓   | ×   | mango           |
|                 | B28       | P85         | ×   | ✓   | ✓   | ✓   | ×   | red bayberry    |
|                 |           | P86         | ×   | ✓   | ✓   | ✓   | ×   | plum candy      |
|                 | B29       | P87         | ×   | ✓   | ✓   | ✓   | ×   | red bayberry    |
|                 |           | P88         | ×   | ✓   | ✓   | ✓   | ×   | plum candy      |
|                 | B30       | P89         | ×   |     | ✓   | ✓   | ×   | red bayberry    |
|                 |           | P90         | ×   |     | ✓   | ✓   | ×   | plum candy      |
|                 |           | P91         | ×   |     | ✓   | ✓   | ×   | grape           |
|                 | B31       | P92         | ×   | ✓   | ✓   | ×   | ×   | red bayberry    |
|                 |           | P93         | ×   | ✓   | ✓   | ×   | ×   | plum candy      |
|                 |           | P94         | ×   | ✓   | ✓   | ×   | ×   | grape           |



Table S2. Continue

| product groups  | brand No. | Product No. | ACE  | ASP | SAC | CYC | NEO                      | details           |                       |
|-----------------|-----------|-------------|------|-----|-----|-----|--------------------------|-------------------|-----------------------|
| preserved fruit | B32       | P95         | ×    | ✓   | ✓   | ✓   | ×                        | red bayberry      |                       |
|                 |           | P96         | ×    | ✓   | ✓   | ✓   | ×                        | plum candy        |                       |
|                 |           | P97         | ×    | ✓   | ✓   | ✓   | ×                        | grape             |                       |
|                 | B33       | P98         | ×    | ×   | ✓   | ×   | ✓                        | red bayberry      |                       |
|                 |           | P99         | ×    | ×   | ✓   | ×   | ✓                        | plum candy        |                       |
|                 |           | P100        | ×    | ×   | ✓   | ×   | ✓                        | grape             |                       |
|                 | B34       | P101        | ×    | ×   | ✓   | ✓   | ×                        | cocoa flavor      |                       |
|                 |           | P102        | ×    | ×   | ✓   | ✓   | ×                        | red bayberry      |                       |
|                 |           | P103        | ×    | ×   | ✓   | ✓   | ×                        | plum candy        |                       |
|                 |           | P104        | ×    | ×   | ✓   | ✓   | ×                        | green plum        |                       |
|                 | beverages | B35         | P105 | ×   | ✓   | ×   | ×                        | ×                 | apple flavor          |
|                 |           |             | P106 | ×   | ✓   | ×   | ×                        | ×                 | apple flavor (puried) |
|                 |           | B36         | P107 | ✓   | ✓   | ×   | ×                        | ×                 | orange flavor         |
|                 |           |             | P108 | ✓   | ✓   | ×   | ×                        | ×                 | strawberry            |
| P109            |           |             | ✓    | ✓   | ×   | ×   | ×                        | watermelon flavor |                       |
| P110            |           |             | ✓    | ✓   | ×   | ×   | ×                        | grapefruit favor  |                       |
| B37             |           | P111        | ✓    | ✓   | ×   | ×   | ×                        | orange flavor     |                       |
|                 |           | P112        | ✓    | ✓   | ×   | ×   | ×                        | strawberry        |                       |
|                 |           | P113        | ✓    | ✓   | ×   | ×   | ×                        | watermelon flavor |                       |
|                 |           | P114        | ✓    | ✓   | ×   | ×   | ×                        | snow pear         |                       |
| B38             |           | P115        | ✓    | ✓   | ×   | ×   | ×                        | grapefruit favor  |                       |
|                 |           | P116        | ✓    | ✓   | ×   | ×   | ×                        | orange flavor     |                       |
|                 |           | P117        | ✓    | ✓   | ×   | ×   | ×                        | strawberry        |                       |
| B39             |           | P118        | ✓    | ×   | ×   | ×   | ×                        | watermelon flavor |                       |
|                 | P119      | ✓           | ×    | ×   | ×   | ×   | orange flavor            |                   |                       |
|                 | P120      | ✓           | ×    | ×   | ×   | ×   | strawberry               |                   |                       |
| B40             | P121      | ✓           | ✓    | ×   | ×   | ×   | orange flavor            |                   |                       |
|                 | P122      | ✓           | ✓    | ×   | ×   | ×   | strawberry               |                   |                       |
| candies         | B41       | P123        | ✓    | ✓   | ×   | ×   | ×                        | chewing gum       |                       |
|                 |           | P124        | ✓    | ✓   | ×   | ×   | ×                        | chewing gum       |                       |
|                 |           | P125        | ✓    | ✓   | ×   | ×   | ×                        | chewing gum       |                       |
|                 |           | P126        | ✓    | ✓   | ×   | ×   | ×                        | chewing gum       |                       |
|                 |           | P127        | ✓    | ✓   | ×   | ×   | ×                        | chewing gum       |                       |
|                 | B42       | P128        | ✓    | ✓   | ×   | ×   | ×                        | chewing gum       |                       |
|                 |           | P129        | ✓    | ✓   | ×   | ×   | ×                        | chewing gum       |                       |
|                 |           | P130        | ✓    | ✓   | ×   | ×   | ×                        | chewing gum       |                       |
|                 |           | P131        | ✓    | ✓   | ×   | ×   | ×                        | chewing gum       |                       |
|                 | B43       | P132        | ×    | ✓   | ×   | ×   | ×                        | chewing gum       |                       |
|                 |           | P133        | ×    | ✓   | ×   | ×   | ×                        | chewing gum       |                       |
|                 |           | P134        | ×    | ✓   | ×   | ×   | ×                        | chewing gum       |                       |
|                 |           | P135        | ×    | ✓   | ×   | ×   | ×                        | chewing gum       |                       |
|                 | B44       | P136        | ✓    | ✓   | ×   | ×   | ×                        | chewing gum       |                       |
| P137            |           | ✓           | ✓    | ×   | ×   | ×   | chewing gum              |                   |                       |
| P138            |           | ✓           | ✓    | ×   | ×   | ×   | chewing gum              |                   |                       |
| B45             | P139      | ×           | ✓    | ×   | ×   | ×   | chewing gum              |                   |                       |
|                 | P140      | ×           | ✓    | ×   | ×   | ×   | chewing gum              |                   |                       |
|                 | P141      | ×           | ✓    | ×   | ×   | ×   | chewing gum              |                   |                       |
| B46             | P142      | ✓           | ✓    | ×   | ×   | ×   | marshmallow (strawberry) |                   |                       |
|                 | P143      | ✓           | ✓    | ×   | ×   | ×   | marshmallow (mint)       |                   |                       |

Table S2. Continue

| product groups | brand No. | Product No. | ACE | ASP | SAC | CYC | NEO                  | details                  |
|----------------|-----------|-------------|-----|-----|-----|-----|----------------------|--------------------------|
| candies        | B47       | P144        | ×   | ✓   | ×   | ×   | ×                    | marshmallow (strawberry) |
|                |           | P145        | ×   | ✓   | ×   | ×   | ×                    | marshmallow (mint)       |
|                |           | P146        | ×   | ✓   | ×   | ×   | ×                    | marshmallow (mustard)    |
|                | B48       | P147        | ×   | ✓   | ×   | ×   | ×                    | marshmallow (orange)     |
|                |           | P148        | ×   | ✓   | ×   | ×   | ×                    | soy milk (strawberry)    |
|                |           | P149        | ×   | ✓   | ×   | ×   | ×                    | soy milk (orange)        |
| condiments     | B49       | P150        | ×   | ✓   | ×   | ×   | ×                    | soy milk (cocoa)         |
|                |           | P151        | ✓   | ×   | ×   | ×   | ×                    | light soy sauce          |
|                |           | P152        | ✓   | ×   | ×   | ×   | ×                    | dark soy sauce           |
|                | B50       | P153        | ✓   | ×   | ×   | ×   | ×                    | super soy sauce          |
|                |           | P154        | ✓   | ✓   | ×   | ×   | ×                    | light soy sauce (510 mL) |
|                |           | P155        | ✓   | ✓   | ×   | ×   | ×                    | light soy sauce (1.9 L)  |
|                |           | P156        | ✓   | ✓   | ×   | ×   | ×                    | dark soy sauce           |
|                |           | P157        | ✓   | ✓   | ×   | ×   | ×                    | super soy sauce          |
|                | B51       | P158        | ✓   | ×   | ×   | ×   | ×                    | light soy sauce          |
|                |           | P159        | ✓   | ×   | ×   | ×   | ×                    | dark soy sauce (560 mL)  |
|                |           | P160        | ✓   | ×   | ×   | ×   | ×                    | super soy sauce          |
|                | B52       | P161        | ✓   | ×   | ×   | ×   | ×                    | dark soy sauce (2.5 L)   |
|                |           | P162        | ✓   | ×   | ×   | ×   | ×                    | light soy sauce          |
|                |           | P163        | ✓   | ×   | ×   | ×   | ×                    | dark soy sauce           |
|                | B53       | P164        | ✓   | ×   | ×   | ×   | ×                    | super soy sauce          |
|                |           | P165        | ✓   | ✓   | ×   | ×   | ×                    | light soy sauce          |
|                |           | P166        | ✓   | ✓   | ×   | ×   | ×                    | dark soy sauce           |
|                | B54       | P167        | ✓   | ✓   | ×   | ×   | ×                    | super soy sauce          |
|                |           | P168        | ✓   | ×   | ×   | ×   | ×                    | light soy sauce          |
|                |           | P169        | ✓   | ×   | ×   | ×   | ×                    | dark soy sauce           |
|                | B55       | P170        | ✓   | ×   | ×   | ×   | ×                    | super soy sauce          |
|                |           | P171        | ✓   | ✓   | ×   | ×   | ×                    | light soy sauce          |
|                |           | P172        | ✓   | ✓   | ×   | ×   | ×                    | dark soy sauce           |
|                | B56       | P173        | ✓   | ✓   | ×   | ×   | ×                    | super soy sauce          |
|                |           | P174        | ✓   | ×   | ×   | ×   | ×                    | light soy sauce          |
|                |           | P175        | ✓   | ×   | ×   | ×   | ×                    | dark soy sauce           |
|                | B57       | P176        | ✓   | ×   | ×   | ×   | ×                    | super soy sauce          |
| P177           |           | ✓           | ×   | ×   | ×   | ×   | light soy sauce      |                          |
| P178           |           | ✓           | ×   | ×   | ×   | ×   | dark soy sauce       |                          |
| B58            | P179      | ✓           | ✓   | ×   | ×   | ×   | super soy sauce      |                          |
|                | P180      | ✓           | ✓   | ×   | ×   | ×   | light soy sauce      |                          |
|                | P181      | ✓           | ✓   | ×   | ×   | ×   | dark soy sauce       |                          |
| B59            | P182      | ✓           | ×   | ×   | ×   | ×   | sweet chili sauce    |                          |
|                | P183      | ✓           | ×   | ×   | ×   | ×   | sweet chili sauce    |                          |
| B60            | P184      | ✓           | ×   | ×   | ×   | ×   | sweet chili sauce    |                          |
|                | P185      | ✓           | ×   | ×   | ×   | ×   | tomato sauce (220 g) |                          |
| puffed food    | B61       | P186        | ✓   | ×   | ×   | ×   | ×                    | tomato sauce (340 g)     |
|                |           | P187        | ×   | ✓   | ×   | ×   | ×                    | lime flavor              |
|                |           | P188        | ×   | ✓   | ×   | ×   | ×                    | red meat flavor          |
|                | B62       | P189        | ×   | ✓   | ×   | ×   | ×                    | cucumber flavor          |
|                |           | P190        | ×   | ✓   | ×   | ×   | ×                    | numb&spicy flavor        |
|                |           | P191        | ×   | ✓   | ×   | ×   | ×                    | red meat flavor          |
|                |           | P192        | ×   | ✓   | ×   | ×   | ×                    | cucumber flavor          |
|                |           | P193        | ×   | ✓   | ×   | ×   | ×                    | numb&spicy flavor        |

Table S2. Continue

| product groups | brand No. | Product No. | ACE  | ASP | SAC | CYC | NEO                                | details                              |
|----------------|-----------|-------------|------|-----|-----|-----|------------------------------------|--------------------------------------|
| puffed food    | B63       | P194        | ×    | ✓   | ×   | ×   | ×                                  | tomato flavor                        |
|                |           | P195        | ×    | ✓   | ×   | ×   | ×                                  | lime flavor                          |
|                | B64       | P196        | ×    | ✓   | ×   | ×   | ×                                  | tomato flavor                        |
|                |           | P197        | ×    | ✓   | ×   | ×   | ×                                  | lime flavor                          |
|                | B65       | P198        | ×    | ✓   | ×   | ×   | ×                                  | cucumber                             |
|                |           | P199        | ×    | ✓   | ×   | ×   | ×                                  | red meat flavor                      |
| P200           |           | ×           | ✓    | ×   | ×   | ×   | lime flavor                        |                                      |
| commodities    | B66       | P201        | ×    | ×   | ✓   | ×   | ×                                  | mouthwash (green tea)                |
|                |           | P202        | ×    | ×   | ✓   | ×   | ×                                  | mouthwash (mint)                     |
|                | B67       | P203        | ×    | ×   | ✓   | ×   | ×                                  | mouthwash (light)                    |
|                |           | P204        | ×    | ×   | ✓   | ×   | ×                                  | mouthwash (heavy)                    |
|                | B68       | P205        | ×    | ×   | ✓   | ×   | ×                                  | mouthwash (light)                    |
|                |           | P206        | ×    | ×   | ✓   | ×   | ×                                  | mouthwash (heavy)                    |
|                | B69       | P207        | ×    | ×   | ✓   | ×   | ×                                  | mouthwash (light)                    |
|                |           | P208        | ×    | ×   | ✓   | ×   | ×                                  | mouthwash (heavy)                    |
|                | B70       | P209        | ×    | ×   | ✓   | ×   | ×                                  | mouthwash (light)                    |
|                |           | P210        | ×    | ×   | ✓   | ×   | ×                                  | mouthwash (heavy)                    |
|                |           | B71         | P211 | ×   | ×   | ✓   | ×                                  | ×                                    |
|                | P212      |             | ×    | ×   | ✓   | ×   | ×                                  | toothpaste for children (strawberry) |
|                | P213      |             | ×    | ×   | ✓   | ×   | ×                                  | toothpaste for children (apple)      |
|                | B72       | P214        | ×    | ×   | ✓   | ×   | ×                                  | toothpaste for children (orange)     |
|                |           | P215        | ×    | ×   | ✓   | ×   | ×                                  | toothpaste for children (strawberry) |
|                |           | P216        | ×    | ×   | ✓   | ×   | ×                                  | toothpaste for children (fruit)      |
|                | B73       | P217        | ×    | ×   | ✓   | ×   | ×                                  | toothpaste for children (orange)     |
|                |           | P218        | ×    | ×   | ✓   | ×   | ×                                  | toothpaste for children (mint)       |
|                |           | P219        | ×    | ×   | ✓   | ×   | ×                                  | toothpaste for children (banana)     |
|                | B74       | P220        | ×    | ×   | ✓   | ×   | ×                                  | toothpaste for children (orange)     |
|                |           | P221        | ×    | ×   | ✓   | ×   | ×                                  | toothpaste for children (strawberry) |
|                |           | P222        | ×    | ×   | ✓   | ×   | ×                                  | toothpaste for children (apple)      |
|                | B75       | P223        | ×    | ×   | ✓   | ×   | ×                                  | toothpaste for children (orange)     |
|                |           | P224        | ×    | ×   | ✓   | ×   | ×                                  | toothpaste for children (strawberry) |
|                |           | P225        | ×    | ×   | ✓   | ×   | ×                                  | toothpaste for children (banana)     |
|                | B76       | P226        | ×    | ×   | ✓   | ×   | ×                                  | toothpaste for children (apple)      |
|                |           | P227        | ×    | ×   | ✓   | ×   | ×                                  | toothpaste for children (strawberry) |
|                |           | P228        | ×    | ×   | ✓   | ×   | ×                                  | toothpaste for children (orange)     |
|                | B77       | P229        | ×    | ×   | ✓   | ×   | ×                                  | toothpaste for children (orange)     |
|                |           | P230        | ×    | ×   | ✓   | ×   | ×                                  | toothpaste for children (strawberry) |
|                |           | P231        | ×    | ×   | ✓   | ×   | ×                                  | toothpaste for children (apple)      |
|                | B78       | P232        | ×    | ×   | ✓   | ×   | ×                                  | toothpaste for children (orange)     |
|                |           | P233        | ×    | ×   | ✓   | ×   | ×                                  | toothpaste for children (strawberry) |
|                |           | P234        | ×    | ×   | ✓   | ×   | ×                                  | toothpaste for children (apple)      |
|                | B79       | P235        | ×    | ×   | ✓   | ×   | ×                                  | toothpaste for children (orange)     |
|                |           | P236        | ×    | ×   | ✓   | ×   | ×                                  | toothpaste for children (strawberry) |
|                |           | P237        | ×    | ×   | ✓   | ×   | ×                                  | toothpaste for children (apple)      |
|                | B80       | P238        | ×    | ×   | ✓   | ×   | ×                                  | toothpaste for adults (efficacy#1)   |
|                |           | P239        | ×    | ×   | ✓   | ×   | ×                                  | toothpaste for adults (efficacy#2)   |
|                |           | P240        | ×    | ×   | ✓   | ×   | ×                                  | toothpaste for adults (efficacy#3)   |
|                | B81       | P241        | ×    | ×   | ✓   | ×   | ×                                  | toothpaste for adults (efficacy#1)   |
|                |           | P242        | ×    | ×   | ✓   | ×   | ×                                  | toothpaste for adults (efficacy#2)   |
| P243           |           | ×           | ×    | ✓   | ×   | ×   | toothpaste for adults (efficacy#3) |                                      |

Table S2. Continue

| product groups | brand No. | Product No. | ACE | ASP | SAC | CYC | NEO | details                            |
|----------------|-----------|-------------|-----|-----|-----|-----|-----|------------------------------------|
| commodities    | B82       | P244        | ×   | ×   | ✓   | ×   | ×   | toothpaste for adults (efficacy#1) |
|                |           | P245        | ×   | ×   | ✓   | ×   | ×   | toothpaste for adults (efficacy#2) |
|                |           | P246        | ×   | ×   | ✓   | ×   | ×   | toothpaste for adults (efficacy#3) |
|                | B83       | P247        | ×   | ×   | ✓   | ×   | ×   | toothpaste for adults (efficacy#1) |
|                |           | P248        | ×   | ×   | ✓   | ×   | ×   | toothpaste for adults (efficacy#2) |
|                |           | P249        | ×   | ×   | ✓   | ×   | ×   | toothpaste for adults (efficacy#3) |
|                | B84       | P250        | ×   | ×   | ✓   | ×   | ×   | toothpaste for adults (efficacy#1) |
|                |           | P251        | ×   | ×   | ✓   | ×   | ×   | toothpaste for adults (efficacy#2) |
|                |           | P252        | ×   | ×   | ✓   | ×   | ×   | toothpaste for adults (efficacy#3) |
|                | B85       | P253        | ×   | ×   | ✓   | ×   | ×   | toothpaste for adults (efficacy#1) |
|                |           | P254        | ×   | ×   | ✓   | ×   | ×   | toothpaste for adults (efficacy#2) |
|                |           | P255        | ×   | ×   | ✓   | ×   | ×   | toothpaste for adults (efficacy#3) |
|                | B86       | P256        | ×   | ×   | ✓   | ×   | ×   | toothpaste for adults (efficacy#1) |
|                |           | P257        | ×   | ×   | ✓   | ×   | ×   | toothpaste for adults (efficacy#2) |
|                |           | P258        | ×   | ×   | ✓   | ×   | ×   | toothpaste for adults (efficacy#3) |
|                | B87       | P259        | ×   | ×   | ✓   | ×   | ×   | toothpaste for adults (efficacy#1) |
|                |           | P260        | ×   | ×   | ✓   | ×   | ×   | toothpaste for adults (efficacy#2) |
|                |           | P261        | ×   | ×   | ✓   | ×   | ×   | toothpaste for adults (efficacy#3) |

<sup>a</sup> These information comes from ingredient lists

<sup>b</sup> ✓ = product contains this AS.

<sup>c</sup> × = product does not contains this AS.

**Table S4**Distribution of each AS in food products and living supplies investigated in China <sup>a</sup>.

|                                    | ACE | ASP | SAC | CYC | NEO |
|------------------------------------|-----|-----|-----|-----|-----|
| all ( <i>n</i> <sup>b</sup> = 261) | 111 | 100 | 124 | 60  | 3   |
| pickles ( <i>n</i> = 45)           | 45  | 0   | 6   | 9   | 0   |
| preserved fruit ( <i>n</i> = 59)   | 0   | 30  | 57  | 51  | 3   |
| beverages ( <i>n</i> = 18)         | 16  | 15  | 0   | 0   | 0   |
| candies ( <i>n</i> = 28)           | 14  | 28  | 0   | 0   | 0   |
| condiments ( <i>n</i> = 36)        | 36  | 13  | 0   | 0   | 0   |
| puffed food ( <i>n</i> = 14)       | 0   | 14  | 0   | 0   | 0   |
| commodities ( <i>n</i> = 61)       | 0   | 0   | 61  | 0   | 0   |

<sup>a</sup> the number of investigated products containing this AS is shown in corresponding blank.<sup>b</sup> the total of investigated products.

**Table S5**

Concentration ratios of SAC, CYC and ACE between blood and urine, and renal clearance rates and daily intake estimated for adults in China <sup>a</sup>.

|     | PB/PU ratio |        |                  |                  | renal clearance (mL/day/kg) |        |      |         | daily intake ( $\mu\text{g}/\text{kg}$ bw/day) |        |      |      |
|-----|-------------|--------|------------------|------------------|-----------------------------|--------|------|---------|------------------------------------------------|--------|------|------|
|     | mean        | median | min <sup>b</sup> | max <sup>c</sup> | mean                        | median | min  | max     | mean                                           | median | min  | max  |
| SAC | 1.06        | 0.16   | 0.002            | 22.3             | 1300                        | 154    | 1.10 | 14,000  | 9.27                                           | 1.72   | 0.07 | 67.5 |
| CYC | 0.017       | 0.004  | < 0.001          | 0.23             | 16,500                      | 5,480  | 94.8 | 180,000 | NA <sup>d</sup>                                | NA     | NA   | NA   |
| ACE | 0.046       | 0.005  | < 0.001          | 0.34             | 10,700                      | 4,810  | 64.4 | 60,000  | 33.8                                           | 4.61   | 0.05 | 229  |

<sup>a</sup> We calculated the PB/PU ratio, renal clearance and daily intake of ASs when all data set were analyzed collectively.

<sup>b</sup> min = minimum value.

<sup>c</sup> max = maximum value.

<sup>d</sup> NA = not available, CYC is metabolized in humans, therefore, urinary level can not be used for the estimation of human CYC exposure dose.

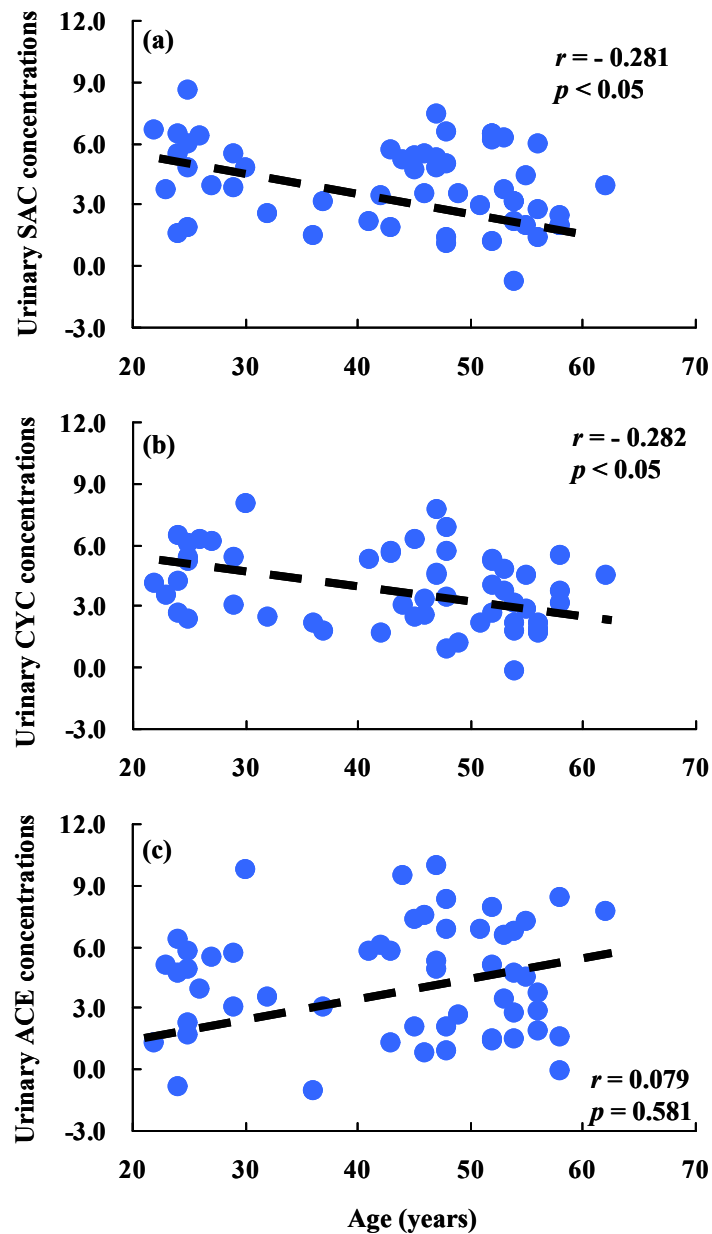

**Fig. S1.** Relationships of creatinine-adjusted urinary SAC, CYC and ACE concentrations with age of donors from Tianjin, China. All concentration values which lower than LOQ were excluded from these analysis; while outliers were included due to that log-transformation concentrations were used for these analyses.

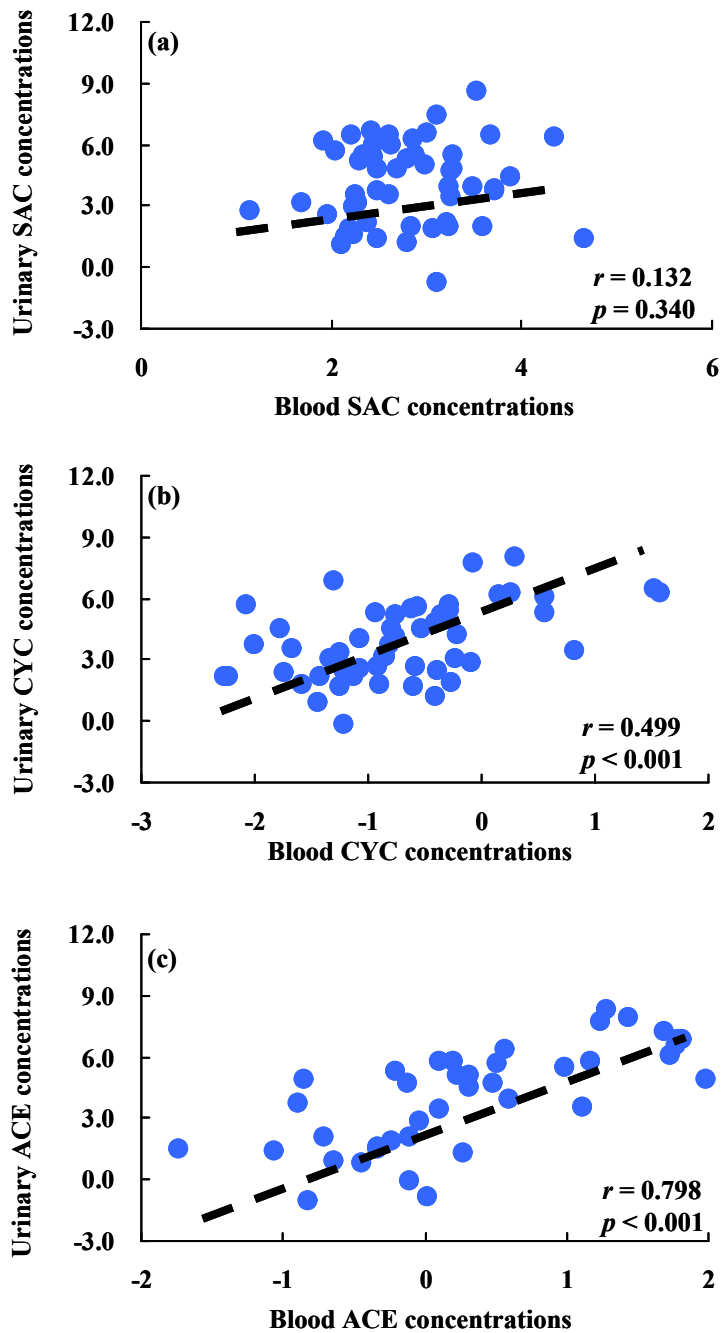

**Fig. S2.** Relationships of individual AS concentrations between urine (creatinine-adjusted) and blood. Plot (a), (b) and (c) represent associations for SAC, CYC, and ACE, respectively; all concentration values which lower than LOQ were excluded from these analysis; while outliers were included due to that log-transformation concentrations were used for these analyses.
